# Supplementary material for: Biochar-Dual Oxidant Composite Particles Alleviate the Oxidative Stress of Phenolic Acid on Tomato Seed Germination
Source: MDPI journal article supplement (doi:10.3390/antiox12040910), 2023-04-11
Supplement: s1 [file s1]

## Supplementary data

# Biochar-dual oxidant composite particles alleviate the oxidative stress of phenolic acid on tomato seed germination

Yuting Tu <sup>1,3,4,†</sup>, Jinchun Shen <sup>2,†</sup>, Zhiping Peng <sup>1,3,4</sup>, Yanggui Xu <sup>1,3,4</sup>, Zhuxian Li <sup>1,3,4</sup>, Jianyi Liang <sup>1,3,4</sup>, Qiufang Wei <sup>5</sup>, Hongbo Zhao <sup>2,\*</sup> and Jichuan Huang <sup>1,3,4,\*</sup>

<sup>1</sup> Institute of Agricultural Resources and Environment, Guangdong Academy of Agricultural Sciences, Guangzhou 510640, China

<sup>2</sup> College of Horticulture, South China Agricultural University, Guangzhou 510642, China

<sup>3</sup> Key Laboratory of Plant Nutrition and Fertilizer in South Region, Ministry of Agriculture, Guangzhou 510640, China

<sup>4</sup> Guangdong Key Laboratory of Nutrient Cycling and Farmland Conservation, Guangzhou 510640, China

<sup>5</sup> College of Natural Resources and Environment, South China Agricultural University, Guangzhou 510642, China

\* Correspondence: zhao@scau.edu.cn (H. Zhao); huangjichuan@gdaas.cn (J. Huang)

† These authors contributed equally to this work.

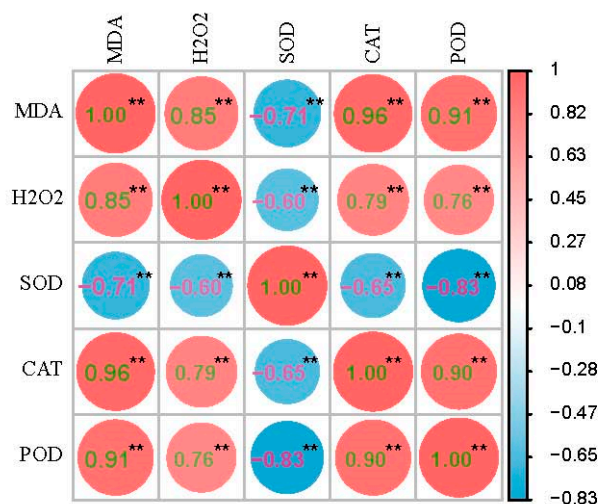

**Figure S1.** Spearman correlation between content of MDA, H<sub>2</sub>O<sub>2</sub>, and enzymatic activities of SOD, CAT and POD in tomato seed radicals on the 7th day of culture. Abbreviations: MDA, malondialdehyde; SOD, superoxide dismutase; CAT, catalase; POD, peroxidase.

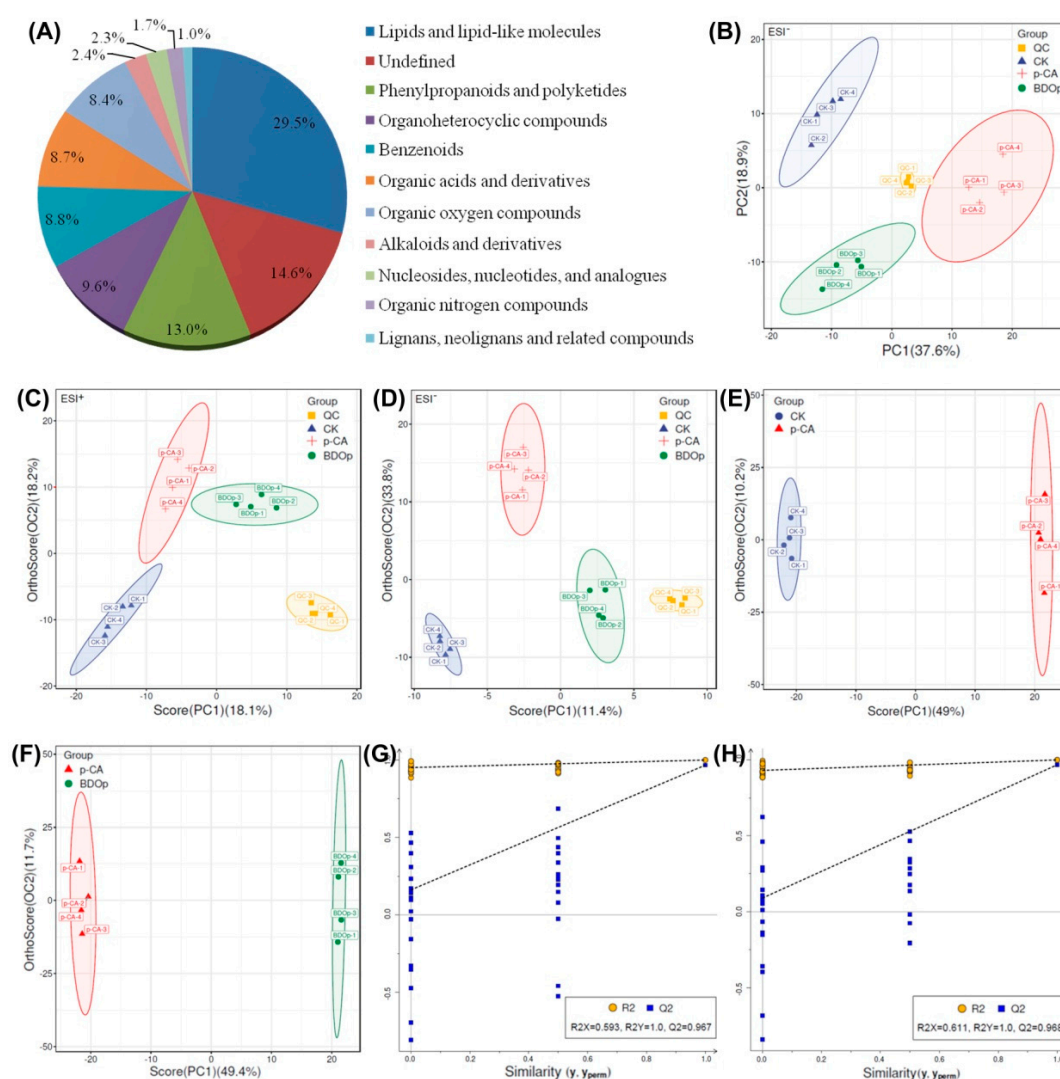

**Figure S2.** Pie chart of metabolite categorization (A). PCA score plot of metabolites under negative (ESI<sup>-</sup>) ion mode (B). OPLS-DA plots of metabolites in three different treatment groups under positive (ESI<sup>+</sup>) (C) and negative (ESI<sup>-</sup>) (D) ion mode. OPLS-DA score plot of metabolites in CK and *p*-CA group (E) and *p*-CA and BDOP group (F). Permutation test of OPLS-DA for CK vs. *p*-CA (G) and *p*-CA vs. BDOP (H). (QC: quality control; CK: ddH<sub>2</sub>O control group; *p*-CA: treatment group with 10 mL 400 mg/L *p*-coumaric acid; BDOP: *p*-coumaric acid with biochar–dual oxidant particles. Each treatment was subjected to four biological replicates)

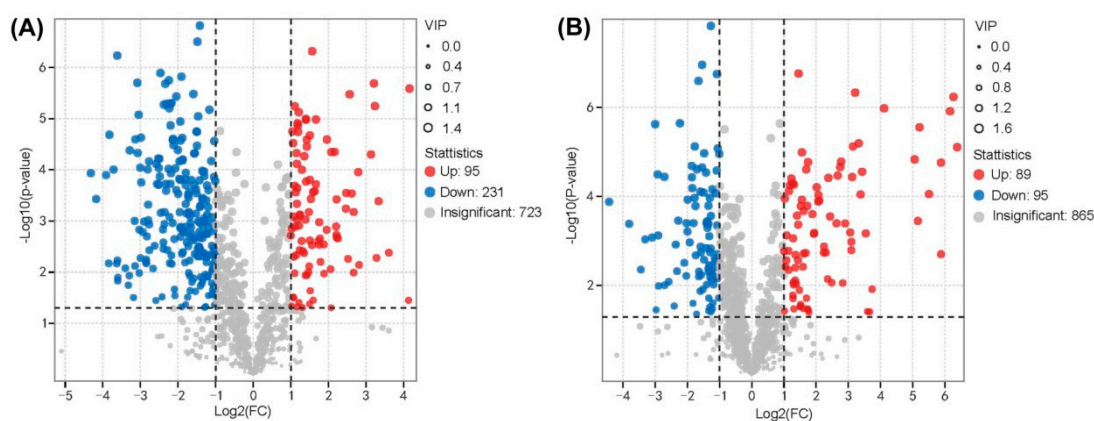

**Figure S3.** Volcano map of metabolites in *p*-CA vs. BDOP (A) and CK vs. BDOP group (B).

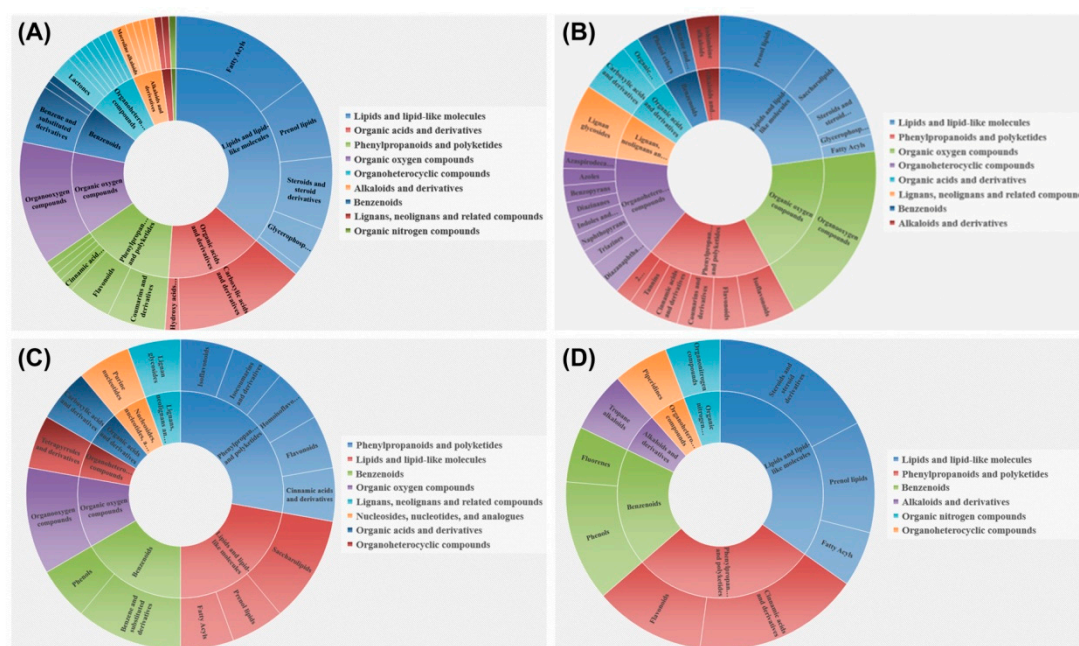

**Figure S4.** The sunburst chart for classification of the 165 up-regulated (A) and 59 down-regulated (B) DAMs in response to the *p*-CA stress, and 19 up-regulated (C) and 25 down-regulated (D) DAMs specifically regulated by the BDO composite particles.

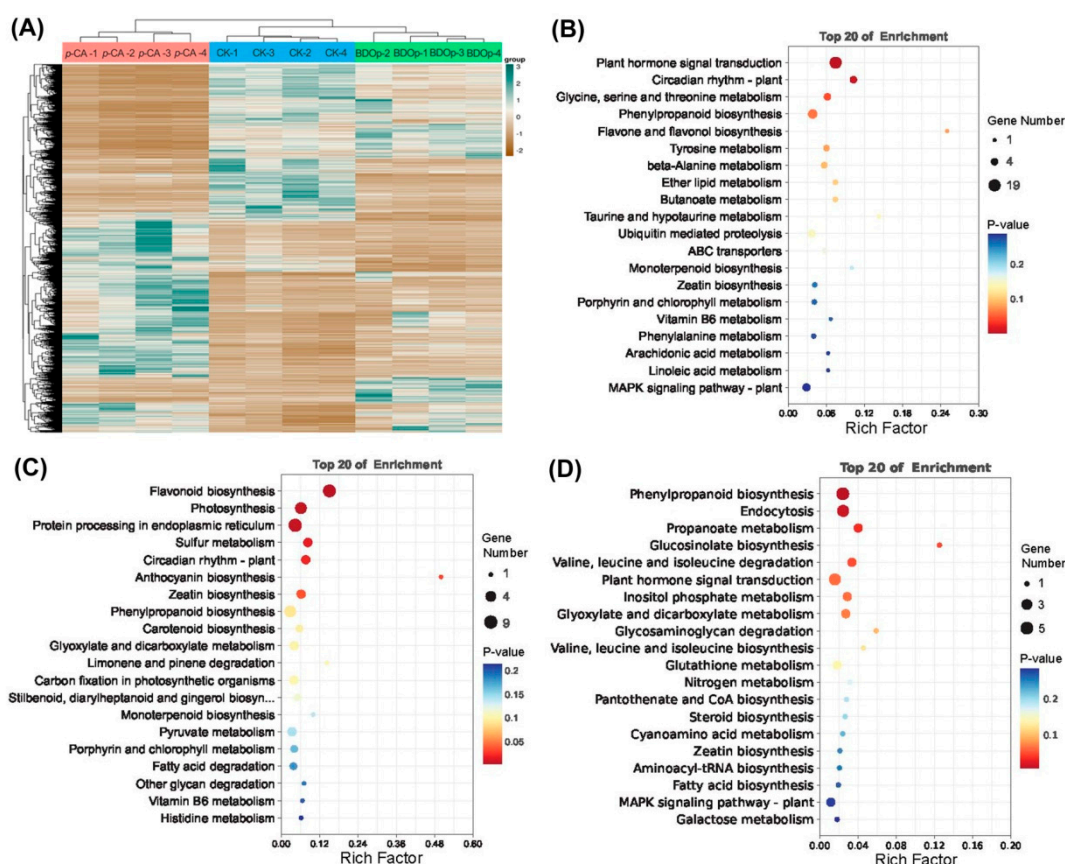

**Figure S5.** Hierarchical clustering heatmap of FPKM profiles in three treatments groups (A). The bubble diagrams for the top 20 KEGG pathways for 863 down-regulated DEGs in response to the *p*-CA stress (B), and 159 up-regulated (C) and 259 down-regulated (D) DEGs specifically regulated by the BDO composite particles. (CK: ddH<sub>2</sub>O control group; *p*-CA: treatment group with 10 mL 400 mg/L *p*-coumaric acid; BDOp: *p*-coumaric acid with biochar-dual oxidant particles. Each treatment was subjected to four biological replicates).

**Table S1.** Effect of different *p*-coumaric acid concentrations on the germination of tomato seeds.

| Concentration (mg/L) | GP (%)     | GR (%)     | RL (mm)    |
|----------------------|------------|------------|------------|
| 0                    | 86.5±1.9 a | 95.0±2.6 a | 61.7±1.9 a |
| 200                  | 47.3±2.2 b | 93.0±3.5 a | 50.0±1.3 b |
| 400                  | 0.0±0.0 c  | 92.5±3.4 a | 23.9±1.2 c |
| 600                  | 0.0±0.0 c  | 84.0±4.9 b | 19.1±1.0 d |
| 800                  | 0.0±0.0 c  | 81.0±4.2 b | 8.5±0.4 e  |
| 1000                 | 0.0±0.0 c  | 51.0±2.6 c | 4.6±0.2 f  |

Abbreviations: GP, germination potential; GR, germination rate; RL, radical length. Each data presents the mean ± standard deviation ( $n = 4$ ). Different letters indicate statistically significant differences between treatments (One-way ANOVA, LSD test,  $P < 0.05$ ).

**Table S2.** Specific primers were used for q-PCR.

| Primer   | Sequence (5'-3')      | Product (bp) |
|----------|-----------------------|--------------|
| CYP73A-F | ACCATAGACTCCTAGCGACCA | 188          |
| CYP73A-R | GTCTTGTCATTCCCCGTGA   |              |
| LOX1_5-F | GGTTGCCACGTCTGAGTTTG  | 127          |
| LOX1_5-R | GACGCGGTCTCTGGGATTAC  |              |
| LOX2S-F  | CAATGGGAAAGGCGAGAGGA  | 137          |
| LOX2S-R  | AGCGCCTGGGATAAGGTTTC  |              |
| LCAT3-F  | GTGCCATGCAAAGGTTCTCTG | 101          |
| LCAT3-R  | TGGGTGCATTCTGACTTCCA  |              |
| FAD2-F   | CCACGAGAGGTGCATGTTCA  | 169          |
| FAD2-R   | CGAATCCGTCAGAAGCAGGA  |              |
| GAPDH-F1 | AGCCACTCAGAAGACCGTTG  | 189          |
| GAPDH-R1 | AGGTCAACCACGGACACATC  |              |

**Table S3.** Effects of various treatments on the tomato seed germination indices

| Treatment                         | GP (%)   | GR (%)   | RL (mm)  | RSA (cm <sup>2</sup> ) | GI (%)   | SE         |
|-----------------------------------|----------|----------|----------|------------------------|----------|------------|
| <i>p</i> -CA + BC-CP <sub>P</sub> | 57.0±2.6 | 89.0±3.8 | 37.7±1.7 | 0.353±0.017            | 57.2±2.7 | -0.30±0.01 |
| <i>p</i> -CA + BC-PS <sub>P</sub> | 0.0±0.0  | 31.0±1.1 | 3.1±0.1  | 0.079±0.004            | 1.6±0.1  | -0.89±0.00 |
| <i>p</i> -CA + CP-PS <sub>P</sub> | 53.0±2.6 | 76.0±1.6 | 9.1±0.6  | 0.209±0.010            | 11.8±0.3 | -0.56±0.00 |

Abbreviations: *p*-CA + BC-CP<sub>P</sub>, 10 mL 400 mg/L *p*-coumaric acid with 0.0277 g biochar and calcium peroxide composite particles; *p*-CA + BC-PS<sub>P</sub>, 10 mL 400 mg/L *p*-coumaric acid with 0.1230 g biochar and potassium persulfate composite particles; *p*-CA + CP-PS<sub>P</sub>, 10 mL 400 mg/L *p*-coumaric acid with 0.0125 g calcium peroxide and potassium persulfate composite particles; GP, germination potential; GR, germination rate; RL, radical length; RSA, radical surface area; GI, germination index; SE, synthetic allelopathic effect index. Each data presents the mean ± standard deviation ( $n = 4$ ). Different letters indicate statistically significant differences between treatments (One-way ANOVA, LSD test,  $P < 0.05$ ).
